# Supplementary material
Source: PubMed Central journal article supplement (PMC1150847)

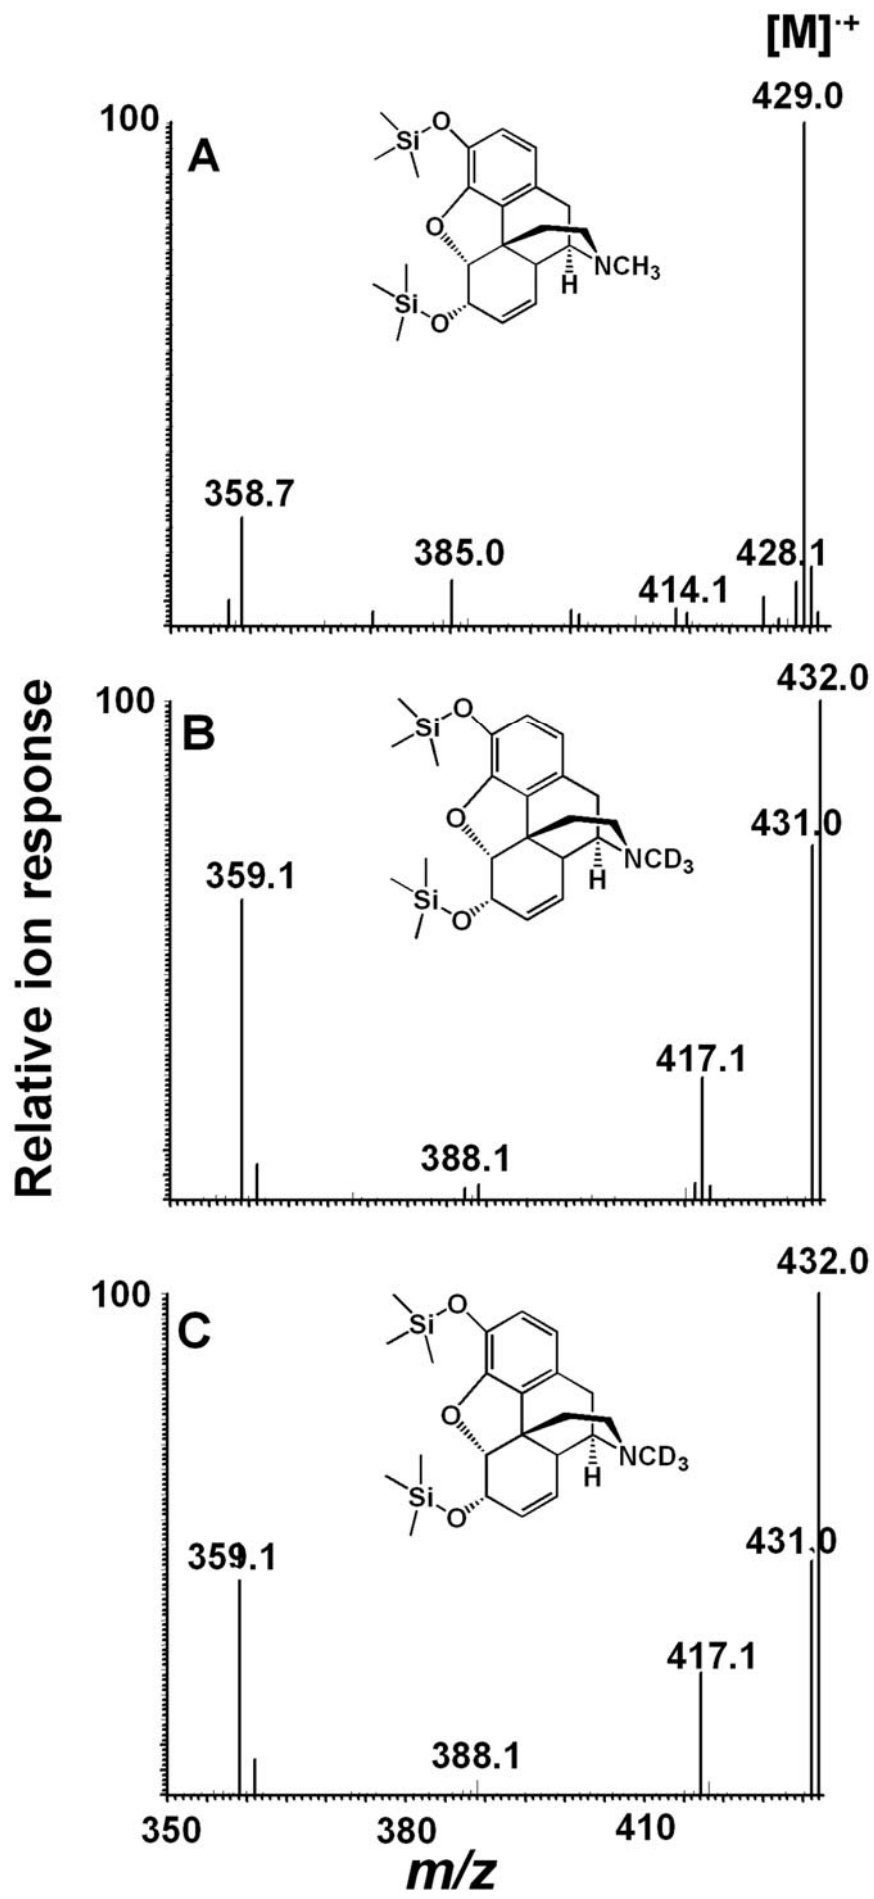

Supplement: pnas_0503244102_2.pdf [file pnas_0503244102_2.pdf]

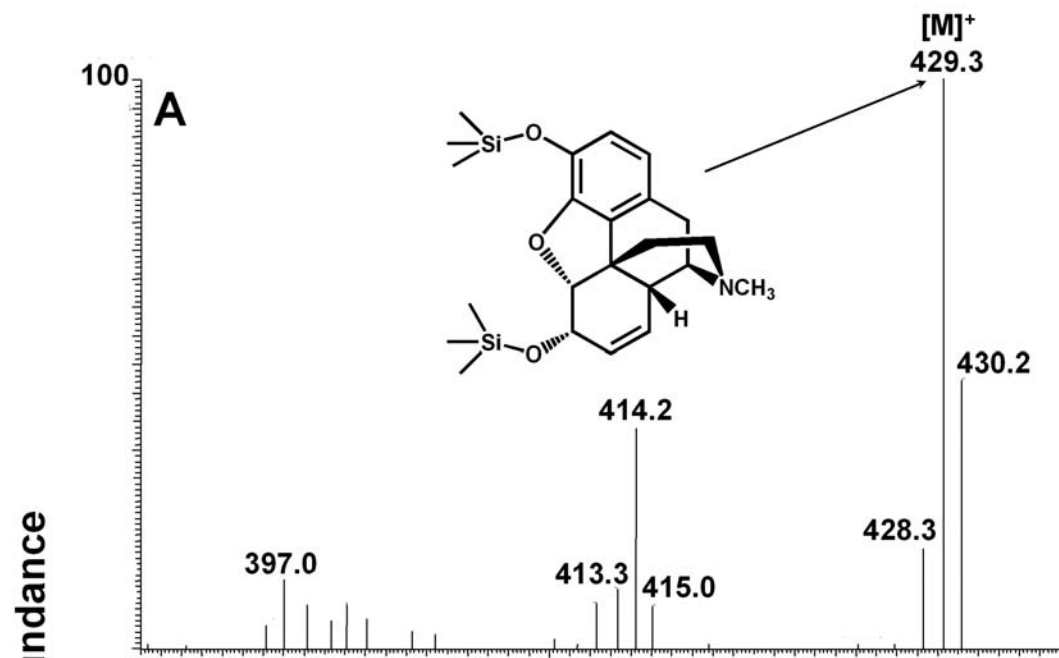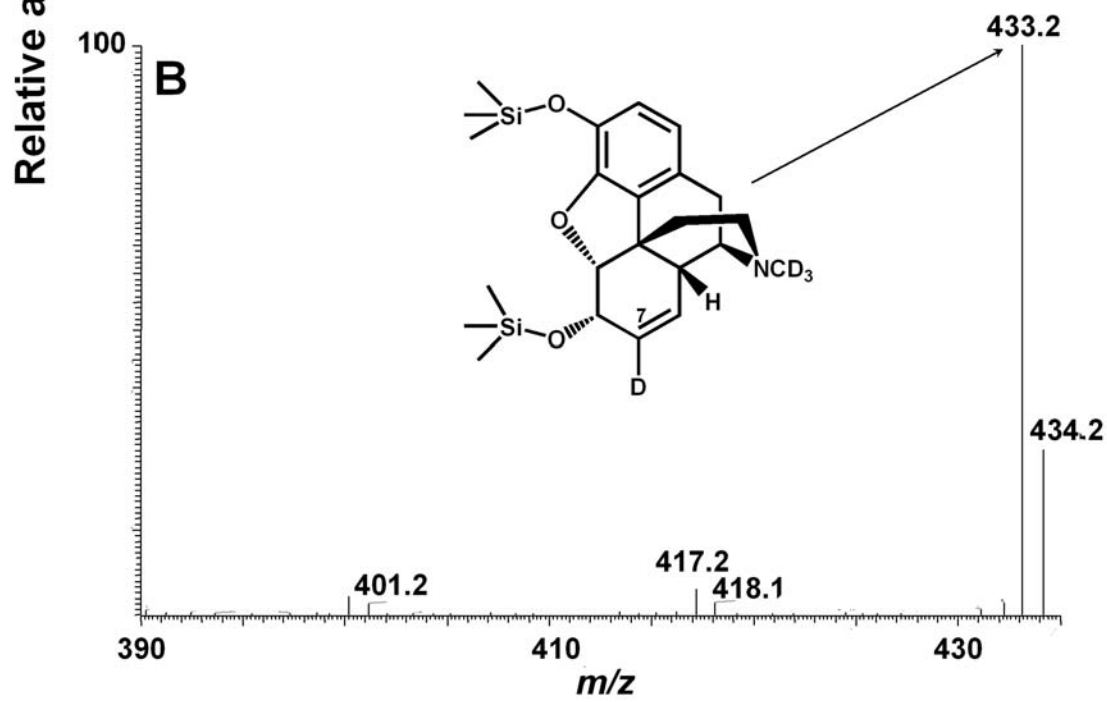

Supplement: pnas_0503244102_3.pdf [file pnas_0503244102_3.pdf]
